# Supplementary material
Source: PubMed Central journal article supplement (PMC5837435)
Supplement: ehx564_suppfig1_ehx564.pdf [file ehx564_suppfig1_ehx564.pdf]

**Beta-blockers for heart failure with reduced, mid-range, and preserved ejection fraction:  
An individual patient-level analysis of double-blind randomized trials**

The Beta-blockers in Heart Failure Collaborative Group

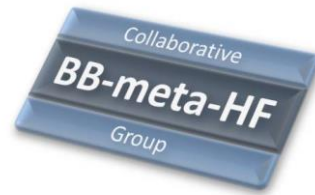

European Heart Journal, 2017 (ehx564)

<https://doi.org/10.1093/eurheartj/ehx564>

Supplementary Figure S1: Study flowchart

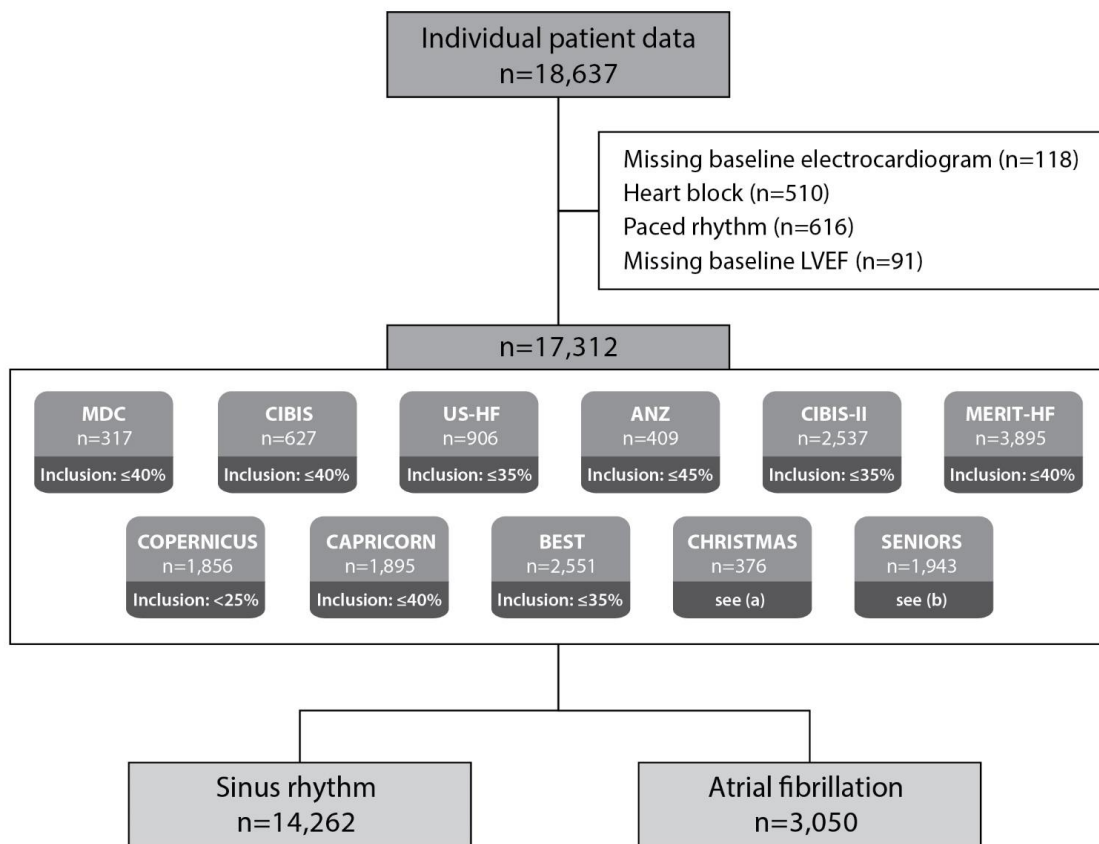

Note that left ventricular ejection fraction (LVEF) entry criteria for trials were often based on an assessment of LVEF that preceded enrolment. Hence at randomization or core laboratory assessment, some patients had LVEF above these inclusion/exclusion criteria and were available for analysis in this individual patient-level dataset. <sup>(a)</sup> Patients with stable heart failure and ischemic wall motion abnormalities. <sup>(b)</sup> Either LVEF ≤35%, or a hospital admission for heart failure within 12 months regardless of LVEF.
