# Supplementary material
Source: PubMed Central journal article supplement (PMC5837435)
Supplement: ehx564_suppfig3_ehx564.pdf [file ehx564_suppfig3_ehx564.pdf]

**Beta-blockers for heart failure with reduced, mid-range, and preserved ejection fraction:  
An individual patient-level analysis of double-blind randomized trials**

The Beta-blockers in Heart Failure Collaborative Group

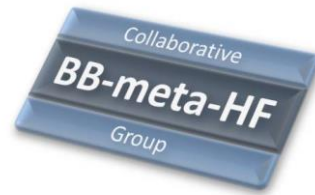

European Heart Journal, 2017 (ehx564)

<https://doi.org/10.1093/eurheartj/ehx564>

Supplementary Figure S3: Scatterplot of change versus baseline LVEF

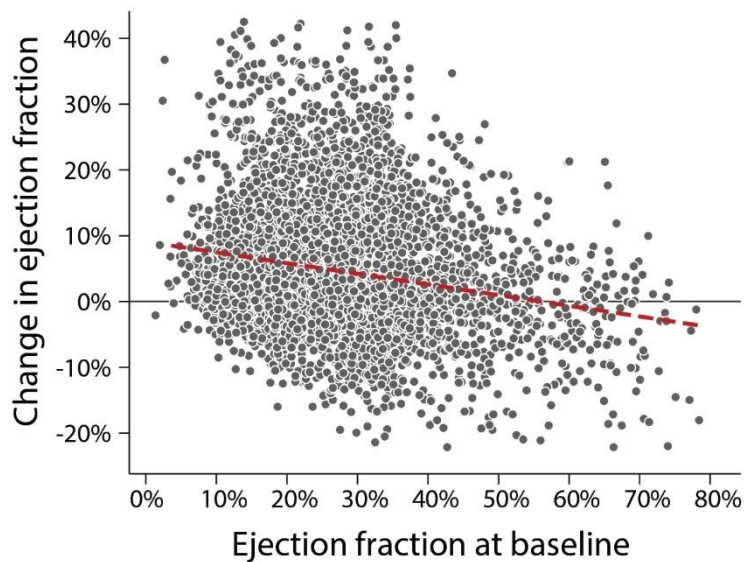

Change in LVEF plotted against baseline value for individual patients in sinus rhythm or atrial fibrillation (n=5,597). Dashed red line is the linear regression line.
