# Supplementary material
Source: PubMed Central journal article supplement (PMC5837435)
Supplement: ehx564_supptables_ehx564.pdf [file ehx564_supptables_ehx564.pdf]

## **Beta-blockers for heart failure with reduced, mid-range, and preserved ejection fraction:**

### **An individual patient-level analysis of double-blind randomized trials**

The Beta-blockers in Heart Failure Collaborative Group

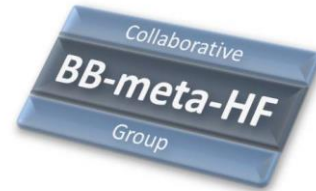

**European Heart Journal, 2017 (ehx564)**

<https://doi.org/10.1093/eurheartj/ehx564>

#### Supplementary Tables

|                                                                                                                          |   |
|--------------------------------------------------------------------------------------------------------------------------|---|
| Supplementary Table S1: Baseline characteristics for patients in atrial fibrillation                                     | 2 |
| Supplementary Table S2: Baseline characteristics according to randomised treatment allocation in sinus rhythm            | 3 |
| Supplementary Table S3: Baseline LVEF and hazard for all-cause and cardiovascular mortality                              | 4 |
| Supplementary Table S4: Mode of death by baseline LVEF category in sinus rhythm                                          | 5 |
| Supplementary Table S5: Mode of death by baseline LVEF category in atrial fibrillation                                   | 6 |
| Supplementary Table S6: Absolute mortality difference and observed change in LVEF according to aetiology in sinus rhythm | 7 |

**Supplementary Table S1: Baseline characteristics for patients in atrial fibrillation**

| Characteristic                                  | Left ventricular ejection fraction at baseline |                    |                    |                    |                    |                    |
|-------------------------------------------------|------------------------------------------------|--------------------|--------------------|--------------------|--------------------|--------------------|
|                                                 | <20%<br>N = 494                                | 20-25%<br>N = 868  | 26-34%<br>N = 1101 | 35-39%<br>N = 368  | 40-49%<br>N = 146  | ≥50%<br>N = 73     |
| LVEF, median (IQR)                              | 0.16 (0.14 - 0.18)                             | 0.23 (0.21 - 0.24) | 0.30 (0.28 - 0.32) | 0.35 (0.35 - 0.37) | 0.41 (0.40 - 0.45) | 0.56 (0.52 - 0.64) |
| Age, median years (IQR)                         | 66 (59 - 73)                                   | 67 (59 - 73)       | 69 (61 - 75)       | 70 (61 - 74)       | 75 (71 - 79)       | 76 (74 - 79)       |
| Women, n (%)                                    | 63 (12.8%)                                     | 128 (14.7%)        | 204 (18.5%)        | 86 (23.4%)         | 72 (49.3%)         | 39 (53.4%)         |
| Years with HF diagnosis, median (IQR)           | 5 (2 - 8)                                      | 4 (2 - 8)          | 3 (1 - 6)          | 3 (1 - 6)          | 3 (1 - 5)          | 1 (0 - 4)          |
| Ischaemic HF aetiology, n (%)                   | 267 (54.0%)                                    | 443 (51.0%)        | 581 (52.8%)        | 233 (63.3%)        | 104 (71.2%)        | 52 (71.2%)         |
| Prior myocardial infarction, n (%)              | 218 (44.3%)                                    | 331 (38.1%)        | 417 (38.2%)        | 168 (46.0%)        | 43 (29.5%)         | 21 (28.8%)         |
| Diabetes Mellitus, n (%)                        | 108 (24.2%)                                    | 200 (23.9%)        | 243 (22.8%)        | 72 (20.7%)         | 32 (22.7%)         | 19 (26.0%)         |
| NYHA class III/IV, n (%)                        | 434 (88.0%)                                    | 765 (88.2%)        | 819 (74.7%)        | 209 (57.3%)        | 56 (38.6%)         | 31 (42.5%)         |
| Heart rate, median bpm (IQR)                    | 84 (73 - 95)                                   | 81 (72 - 92)       | 80 (72 - 91)       | 80 (72 - 89)       | 82 (73 - 92)       | 84 (78 - 96)       |
| Systolic BP, median mmHg (IQR)                  | 120 (107 - 130)                                | 122 (110 - 138)    | 130 (118 - 143)    | 130 (120 - 145)    | 142 (128 - 155)    | 140 (130 - 153)    |
| Diastolic BP, median mmHg (IQR)                 | 73 (65 - 80)                                   | 78 (70 - 82)       | 80 (70 - 87)       | 80 (72 - 87)       | 80 (75 - 90)       | 80 (79 - 89)       |
| Body mass index, median kg/m <sup>2</sup> (IQR) | 27 (24 - 32)                                   | 27 (24 - 31)       | 28 (25 - 31)       | 28 (25 - 31)       | 26 (24 - 29)       | 28 (26 - 31)       |
| Estimated GFR, median mL/min (IQR)              | 57 (45 - 69)                                   | 57 (46 - 70)       | 64 (52 - 77)       | 63 (50 - 75)       | 62 (49 - 76)       | 60 (49 - 78)       |
| Any diuretic therapy, n (%)                     | 480 (97.2%)                                    | 833 (96.0%)        | 1028 (93.4%)       | 312 (84.8%)        | 131 (89.7%)        | 68 (93.2%)         |
| ACEi or ARB, n (%)                              | 464 (93.9%)                                    | 833 (96.0%)        | 1036 (94.1%)       | 352 (95.7%)        | 133 (91.1%)        | 64 (87.7%)         |
| Aldosterone antagonists, n (%)                  | 78 (16.7%)                                     | 176 (20.7%)        | 136 (12.6%)        | 62 (17.6%)         | 27 (18.8%)         | 16 (21.9%)         |
| Digoxin, n (%)                                  | 435 (88.1%)                                    | 749 (86.3%)        | 920 (83.6%)        | 272 (73.9%)        | 117 (80.1%)        | 52 (71.2%)         |

ACEi, angiotensin converting enzyme inhibitor; ARB, angiotensin receptor blocker; BP, blood pressure; bpm, beats/minute; GFR, glomerular filtration rate; HF, heart failure; IQR, interquartile range; LVEF, left-ventricular ejection fraction; NYHA, New York Heart Association.

Missing data report: n=319 for years with HF diagnosis; n=13 for prior myocardial infarction; n=135 for diabetes mellitus; n=431 for NYHA class; n= 2 for diastolic BP; n=8 heart rate; n= 22 for body mass index; n=101 for GFR; n=85 for any diuretic therapy; n=85 for aldosterone antagonists.

**Supplementary Table S2: Baseline characteristics according to randomised treatment allocation in sinus rhythm**

| Characteristic                                  | LVEF <40%         |                        | LVEF 40-49%      |                       | LVEF ≥50%        |                       |
|-------------------------------------------------|-------------------|------------------------|------------------|-----------------------|------------------|-----------------------|
|                                                 | PLACEBO<br>N=6582 | BETA-BLOCKER<br>N=6861 | PLACEBO<br>N=283 | BETA-BLOCKER<br>N=292 | PLACEBO<br>N=121 | BETA-BLOCKER<br>N=123 |
| LVEF, median (IQR)                              | 0.26 (0.20-0.32)  | 0.26 (0.20-0.32)       | 0.40 (0.40-0.44) | 0.40 (0.40-0.43)      | 0.58 (0.52-0.65) | 0.58 (0.54-0.65)      |
| Age, median years (IQR)                         | 63 (54-71)        | 63 (54-71)             | 72 (61-75)       | 70 (60-74)            | 75 (72-78)       | 75 (71-78)            |
| Women, %                                        | 23.6%             | 24.0%                  | 33.6%            | 35.3%                 | 47.9%            | 57.7%                 |
| Years with HF diagnosis, median (IQR)           | 3 (1-6)           | 3 (1-6)                | 2 (1-5)          | 2 (1-5)               | 2 (1-5)          | 2 (0-6)               |
| Ischaemic HF aetiology, %                       | 67.7%             | 67.5%                  | 92.6%            | 89.0%                 | 86.8%            | 84.6%                 |
| Prior myocardial infarction, %                  | 58.0%             | 58.2%                  | 72.3%            | 71.2%                 | 39.7%            | 32.5%                 |
| Diabetes Mellitus, %                            | 24.3%             | 24.6%                  | 23.0%            | 25.1%                 | 30.6%            | 27.6%                 |
| NYHA class III/IV, %                            | 68.1%             | 67.7%                  | 21.6%            | 26.5%                 | 24.0%            | 29.3%                 |
| Heart rate, median bpm (IQR)                    | 80 (72-88)        | 80 (72-88)             | 75 (68-82)       | 76 (70-82)            | 75 (68-84)       | 74 (68-80)            |
| Systolic BP, median mmHg (IQR)                  | 122 (110-138)     | 122 (110-138)          | 132 (120-148)    | 130 (120-145)         | 146 (132-161)    | 147 (132-160)         |
| Diastolic BP, median mmHg (IQR)                 | 77 (70-82)        | 77 (70-82)             | 80 (70-85)       | 80 (70-84)            | 80 (79-90)       | 82 (77-90)            |
| Body mass index, median kg/m <sup>2</sup> (IQR) | 27 (24-31)        | 27 (24-31)             | 27 (25-30)       | 27 (25-30)            | 26 (24-31)       | 27 (25-30)            |
| Estimated GFR, median mL/min (IQR)              | 64 (52-78)        | 64 (51-77)             | 67 (53-78)       | 66 (53-78)            | 67 (54-81)       | 72 (56-85)            |
| Any diuretic therapy, %                         | 85.9%             | 86.1%                  | 67.1%            | 63.7%                 | 81.0%            | 82.1%                 |
| ACEi or ARB, %                                  | 95.2%             | 94.4%                  | 90.1%            | 91.1%                 | 87.6%            | 87.0%                 |
| Aldosterone antagonists, %                      | 8.1%              | 8.3%                   | 6.4%             | 5.3%                  | 9.9%             | 13.9%                 |
| Digoxin, %                                      | 53.6%             | 55.5%                  | 26.4%            | 24.7%                 | 17.1%            | 25.2%                 |

ACEi, angiotensin converting enzyme inhibitor; ARB, angiotensin receptor blocker; BP, blood pressure; bpm, beats/minute; GFR, glomerular filtration rate; HF, heart failure; IQR, interquartile range; LVEF, left-ventricular ejection fraction; NYHA, New York Heart Association.

**Supplementary Table S3: Baseline LVEF and hazard for all-cause and cardiovascular mortality**

|                                                    | All-cause mortality   |                           | Cardiovascular death  |                           |
|----------------------------------------------------|-----------------------|---------------------------|-----------------------|---------------------------|
|                                                    | N (events / patients) | HR, 95% CI; p-value       | N (events / patients) | HR, 95% CI; p-value       |
| Sinus rhythm; per 5% lower LVEF at baseline        | 2,160 / 14,261        | 1.24, 1.21-1.28; p<0.0001 | 1,768 / 14,260        | 1.20, 1.22-1.30; p<0.0001 |
| Atrial fibrillation; per 5% lower LVEF at baseline | 609 / 3,034           | 1.09, 1.03-1.15; p=0.002  | 498 / 3,034           | 1.10, 1.05-1.18; p<0.0001 |

Adjusted hazard ratio (HR) analysed using a one-stage Cox regression model, with studies as strata. See also Supplementary Figure B.

**Supplementary Table S4: Mode of death by baseline LVEF category in sinus rhythm**

| Baseline LVEF                       | <20%                 |                      | 20-25%                |                       | 26-34%                |                       | 35-39%              |                     | 40-49%              |                    | ≥50%              |                     |
|-------------------------------------|----------------------|----------------------|-----------------------|-----------------------|-----------------------|-----------------------|---------------------|---------------------|---------------------|--------------------|-------------------|---------------------|
| Randomised allocation               | PLC                  | BB                   | PLC                   | BB                    | PLC                   | BB                    | PLC                 | BB                  | PLC                 | BB                 | PLC               | BB                  |
| <b>Ischaemic cardiomyopathy</b>     |                      |                      |                       |                       |                       |                       |                     |                     |                     |                    |                   |                     |
| All-cause mortality*                | 229 / 727<br>(31.5%) | 180 / 756<br>(23.8%) | 254 / 1258<br>(20.2%) | 208 / 1314<br>(15.8%) | 248 / 1697<br>(14.6%) | 214 / 1778<br>(12.0%) | 97 / 776<br>(12.5%) | 62 / 786<br>(7.9%)  | 29 / 262<br>(11.1%) | 19 / 260<br>(7.3%) | 9 / 105<br>(8.6%) | 13 / 104<br>(12.5%) |
| CV death                            | 201 / 727<br>(27.6%) | 156 / 756<br>(20.6%) | 220 / 1258<br>(17.5%) | 181 / 1314<br>(13.8%) | 207 / 1697<br>(12.2%) | 172 / 1778<br>(9.7%)  | 78 / 776<br>(10.1%) | 53 / 786<br>(6.7%)  | 22 / 262<br>(8.4%)  | 12 / 260<br>(4.6%) | 6 / 105<br>(5.7%) | 9 / 104<br>(8.7%)   |
| Sudden death                        | 103 / 727<br>(14.2%) | 83 / 756<br>(11.0%)  | 117 / 1258<br>(9.3%)  | 86 / 1314<br>(6.5%)   | 121 / 1697<br>(7.1%)  | 88 / 1778<br>(4.9%)   | 36 / 776<br>(4.6%)  | 29 / 786<br>(3.7%)  | 10 / 262<br>(3.8%)  | 4 / 260<br>(1.5%)  | 2 / 105<br>(1.9%) | 3 / 104<br>(2.9%)   |
| HF-related death                    | 73 / 727<br>(10.0%)  | 45 / 756<br>(6.0%)   | 66 / 1258<br>(5.2%)   | 63 / 1314<br>(4.8%)   | 52 / 1697<br>(3.1%)   | 48 / 1778<br>(2.7%)   | 20 / 776<br>(2.6%)  | 9 / 786<br>(1.1%)   | 6 / 262<br>(2.3%)   | 3 / 260<br>(1.2%)  | 1 / 105<br>(1.0%) | 1 / 104<br>(1.0%)   |
| Non-CV death                        | 10 / 727<br>(1.4%)   | 18 / 756<br>(2.4%)   | 16 / 1258<br>(1.3%)   | 14 / 1314<br>(1.1%)   | 21 / 1697<br>(1.2%)   | 19 / 1778<br>(1.1%)   | 9 / 776<br>(1.2%)   | 4 / 786<br>(0.5%)   | 4 / 262<br>(1.5%)   | 3 / 260<br>(1.2%)  | 1 / 105<br>(1.0%) | 1 / 104<br>(1.0%)   |
| <b>Non-ischaemic cardiomyopathy</b> |                      |                      |                       |                       |                       |                       |                     |                     |                     |                    |                   |                     |
| All-cause mortality*                | 136 / 508<br>(26.8%) | 118 / 561<br>(21.0%) | 99 / 644<br>(15.4%)   | 82 / 669<br>(12.3%)   | 113 / 782<br>(14.5%)  | 81 / 819<br>(9.9%)    | 16 / 189<br>(8.5%)  | 18 / 178<br>(10.1%) | 6 / 21<br>(28.6%)   | 2 / 32<br>(6.3%)   | 2 / 16<br>(12.5%) | 1 / 19<br>(5.3%)    |
| CV death                            | 99 / 508<br>(19.5%)  | 80 / 561<br>(14.3%)  | 72 / 644<br>(11.2%)   | 61 / 669<br>(9.1%)    | 83 / 782<br>(10.6%)   | 54 / 819<br>(6.6%)    | 11 / 189<br>(5.8%)  | 15 / 178<br>(8.4%)  | 4 / 21<br>(19.0%)   | 1 / 32<br>(3.1%)   | 1 / 16<br>(6.3%)  | 0 / 19<br>(0.0%)    |
| Sudden death                        | 48 / 508<br>(9.4%)   | 39 / 561<br>(7.0%)   | 38 / 644<br>(5.9%)    | 27 / 669<br>(4.0%)    | 48 / 782<br>(6.1%)    | 27 / 819<br>(3.3%)    | 9 / 189<br>(4.8%)   | 5 / 178<br>(2.8%)   | 2 / 21<br>(9.5%)    | 1 / 32<br>(3.1%)   | 1 / 16<br>(6.3%)  | 0 / 19<br>(0.0%)    |
| HF-related death                    | 38 / 508<br>(7.5%)   | 28 / 561<br>(5.0%)   | 26 / 644<br>(4.0%)    | 17 / 669<br>(2.5%)    | 22 / 782<br>(2.8%)    | 15 / 819<br>(1.8%)    | 2 / 189<br>(1.1%)   | 6 / 178<br>(3.4%)   | 1 / 21<br>(4.8%)    | 0 / 32<br>(0.0%)   | 0 / 16<br>(0.0%)  | 0 / 19<br>(0.0%)    |
| Non-CV death                        | 8 / 508<br>(1.6%)    | 9 / 561<br>(1.6%)    | 8 / 644<br>(1.2%)     | 7 / 669<br>(1.0%)     | 11 / 782<br>(1.4%)    | 13 / 819<br>(1.6%)    | 3 / 189<br>(1.6%)   | 1 / 178<br>(0.6%)   | 0 / 21<br>(0.0%)    | 0 / 32<br>(0.0%)   | 0 / 16<br>(0.0%)  | 1 / 19<br>(5.3%)    |

BB, beta-blockers; CV, cardiovascular; LVEF, left-ventricular ejection fraction; PLC, placebo. \* Includes deaths due to an unknown cause. Note that some deaths were ascribed to unknown causes and therefore are attributed neither to cardiovascular or non-cardiovascular deaths.

**Supplementary Table S5: Mode of death by baseline LVEF category in atrial fibrillation**

| Baseline LVEF                       | <20%                |                     | 20-25%              |                     | 26-34%              |                     | 35-39%              |                     | 40-49%            |                    | ≥50%              |                   |
|-------------------------------------|---------------------|---------------------|---------------------|---------------------|---------------------|---------------------|---------------------|---------------------|-------------------|--------------------|-------------------|-------------------|
| Randomised allocation               | PLC                 | BB                  | PLC                 | BB                  | PLC                 | BB                  | PLC                 | BB                  | PLC               | BB                 | PLC               | BB                |
| <b>Ischaemic cardiomyopathy</b>     |                     |                     |                     |                     |                     |                     |                     |                     |                   |                    |                   |                   |
| All-cause mortality*                | 47 / 141<br>(33.3%) | 47 / 126<br>(37.3%) | 49 / 224<br>(21.9%) | 44 / 219<br>(20.1%) | 60 / 302<br>(19.9%) | 72 / 279<br>(25.8%) | 29 / 120<br>(24.2%) | 18 / 113<br>(15.9%) | 9 / 50<br>(18.0%) | 14 / 54<br>(25.9%) | 3 / 26<br>(11.5%) | 3 / 26<br>(11.5%) |
| CV death                            | 45 / 141<br>(31.9%) | 39 / 126<br>(31.0%) | 41 / 224<br>(18.3%) | 37 / 219<br>(16.9%) | 51 / 302<br>(16.9%) | 60 / 279<br>(21.5%) | 26 / 120<br>(21.7%) | 14 / 113<br>(12.4%) | 7 / 50<br>(14.0%) | 9 / 54<br>(16.7%)  | 1 / 26<br>(3.8%)  | 2 / 26<br>(7.7%)  |
| Sudden death                        | 17 / 141<br>(12.1%) | 16 / 126<br>(12.7%) | 22 / 224<br>(9.8%)  | 18 / 219<br>(8.2%)  | 19 / 302<br>(6.3%)  | 28 / 279<br>(10.0%) | 15 / 120<br>(12.5%) | 7 / 113<br>(6.2%)   | 1 / 50<br>(2.0%)  | 3 / 54<br>(5.6%)   | 0 / 26<br>(0.0%)  | 0 / 26<br>(0.0%)  |
| HF-related death                    | 25 / 141<br>(17.7%) | 21 / 126<br>(16.7%) | 13 / 224<br>(5.8%)  | 11 / 219<br>(5.0%)  | 24 / 302<br>(7.9%)  | 18 / 279<br>(6.5%)  | 6 / 120<br>(5.0%)   | 5 / 113<br>(4.4%)   | 2 / 50<br>(4.0%)  | 1 / 54<br>(1.9%)   | 0 / 26<br>(0.0%)  | 0 / 26<br>(0.0%)  |
| Non-CV death                        | 2 / 141<br>(1.4%)   | 5 / 126<br>(4.0%)   | 4 / 224<br>(1.8%)   | 5 / 219<br>(2.3%)   | 4 / 302<br>(1.3%)   | 4 / 279<br>(1.4%)   | 0 / 120<br>(0.0%)   | 2 / 113<br>(1.8%)   | 1 / 50<br>(2.0%)  | 2 / 54<br>(3.7%)   | 1 / 26<br>(3.8%)  | 1 / 26<br>(3.8%)  |
| <b>Non-ischaemic cardiomyopathy</b> |                     |                     |                     |                     |                     |                     |                     |                     |                   |                    |                   |                   |
| All-cause mortality*                | 24 / 106<br>(22.6%) | 31 / 121<br>(25.6%) | 42 / 213<br>(19.7%) | 28 / 211<br>(13.3%) | 50 / 255<br>(19.6%) | 31 / 265<br>(11.7%) | 5 / 70<br>(7.1%)    | 8 / 64<br>(12.5%)   | 5 / 17<br>(29.4%) | 5 / 25<br>(20.0%)  | 1 / 11<br>(9.1%)  | 1 / 10<br>(10.0%) |
| CV death                            | 18 / 106<br>(17.0%) | 24 / 121<br>(19.8%) | 34 / 213<br>(16.0%) | 25 / 211<br>(11.8%) | 34 / 255<br>(13.3%) | 22 / 265<br>(8.3%)  | 4 / 70<br>(5.7%)    | 3 / 64<br>(4.7%)    | 4 / 17<br>(23.5%) | 2 / 25<br>(8.0%)   | 1 / 11<br>(9.1%)  | 0 / 10<br>(0.0%)  |
| Sudden death                        | 11 / 106<br>(10.4%) | 7 / 121<br>(5.8%)   | 18 / 213<br>(8.5%)  | 16 / 211<br>(7.6%)  | 20 / 255<br>(7.8%)  | 8 / 265<br>(3.0%)   | 2 / 70<br>(2.9%)    | 1 / 64<br>(1.6%)    | 1 / 17<br>(5.9%)  | 0 / 25<br>(0.0%)   | 1 / 11<br>(9.1%)  | 0 / 10<br>(0.0%)  |
| HF-related death                    | 6 / 106<br>(5.7%)   | 14 / 121<br>(11.6%) | 9 / 213<br>(4.2%)   | 6 / 211<br>(2.8%)   | 7 / 255<br>(2.7%)   | 8 / 265<br>(3.0%)   | 2 / 70<br>(2.9%)    | 1 / 64<br>(1.6%)    | 2 / 17<br>(11.8%) | 2 / 25<br>(8.0%)   | 0 / 11<br>(0.0%)  | 0 / 10<br>(0.0%)  |
| Non-CV death                        | 0 / 106<br>(0.0%)   | 0 / 121<br>(0.0%)   | 2 / 213<br>(0.9%)   | 1 / 211<br>(0.5%)   | 4 / 255<br>(1.6%)   | 3 / 265<br>(1.1%)   | 0 / 70<br>(0.0%)    | 1 / 64<br>(1.6%)    | 0 / 17<br>(0.0%)  | 2 / 25<br>(8.0%)   | 0 / 11<br>(0.0%)  | 1 / 10<br>(10.0%) |

BB, beta-blockers; CV, cardiovascular; LVEF, left-ventricular ejection fraction; PLC, placebo. \* Includes deaths due to an unknown cause. Note that some deaths were ascribed to unknown causes and therefore are attributed neither to cardiovascular or non-cardiovascular deaths.

**Supplementary Table S6: Absolute mortality difference and observed change in LVEF according to aetiology in sinus rhythm**

| Classification                                                                             | ‘Reduced’ LVEF                       |                                     |                                     |                                     | ‘Mid-range’ LVEF                    | ‘Preserved’ LVEF                    |
|--------------------------------------------------------------------------------------------|--------------------------------------|-------------------------------------|-------------------------------------|-------------------------------------|-------------------------------------|-------------------------------------|
|                                                                                            | <20%                                 | 20-25%                              | 26-34%                              | 35-39%                              | 40-49%                              | ≥50%                                |
| <b>Sinus rhythm: Ischaemic aetiology</b>                                                   |                                      |                                     |                                     |                                     |                                     |                                     |
| Change in absolute mortality; beta-blockers vs placebo (95% CI) †                          | n=1483<br>-7.7%<br>(-12.2% to -3.1%) | n=2572<br>-4.4%<br>(-7.3% to -1.4%) | n=3475<br>-2.6%<br>(-4.8% to -0.3%) | n=1562<br>-4.6%<br>(-7.6% to -1.6%) | n=522<br>-3.8%<br>(-8.7% to +1.2%)  | n=209<br>+3.9%<br>(-4.4% to +12.2%) |
| Change in LVEF from baseline to follow-up; mean difference (SE) beta-blockers vs placebo ‡ | n=593<br>+3.1% (0.6%)                | n=667<br>+3.3% (0.6%)               | n=1070<br>+3.0% (0.5%)              | n=277<br>+4.4% (1.0%)               | n=227<br>+2.5% (1.2%)               | n=177<br>+0.6% (1.3%)               |
| <b>Sinus rhythm: Non-ischaemic aetiology</b>                                               |                                      |                                     |                                     |                                     |                                     |                                     |
| Change in absolute mortality; beta-blockers vs placebo (95% CI) †                          | n=1069<br>-5.7%<br>(-10.9% to -0.6%) | n=1313<br>-3.1%<br>(-6.8% to +0.6%) | n=1601<br>-4.6%<br>(-7.8% to -1.4%) | n=367<br>+1.6%<br>(-4.3% to +7.6%)  | n=53<br>-22.3%<br>(-43.4% to -1.3%) | n=35<br>-7.2%<br>(-26.3% to +11.8%) |
| Change in LVEF from baseline to follow-up; mean difference (SE) beta-blockers vs placebo ‡ | n=513<br>+6.2% (0.9%)                | n=401<br>+5.6% (1.0%)               | n=530<br>+6.2% (0.9%)               | n=98<br>+6.3% (2.0%)                | n=24<br>-4.2% (4.3%)                | n=24<br>-4.4% (4.5%)                |

† Median follow-up of 1.3 years (IQR 0.8-1.9)

‡ Median 1.0 years after baseline assessment (IQR 0.3-2.0)

CI = confidence interval; LVEF = left ventricular ejection fraction; SE = standard error of the mean difference.
